# Supplementary material
Source: publisher figshare collection journal article supplement (https://acs.figshare.com/ndownloader/files/4610746)
Supplement: Supplementary file 1 [file 4610746]

 
data_pl349_0m
 
_audit_creation_method            SHELXL-97
_chemical_name_systematic
;
 ?
;
_chemical_name_common             ?
_chemical_melting_point           ?
_chemical_formula_moiety      'C26 H41 N O W'
_chemical_formula_sum
 'C26 H41 N O W'
_chemical_formula_weight          567.45
 
loop_
 _atom_type_symbol
 _atom_type_description
 _atom_type_scat_dispersion_real
 _atom_type_scat_dispersion_imag
 _atom_type_scat_source
 'C'  'C'   0.0033   0.0016
 'International Tables Vol C Tables 4.2.6.8 and 6.1.1.4'
 'H'  'H'   0.0000   0.0000
 'International Tables Vol C Tables 4.2.6.8 and 6.1.1.4'
 'N'  'N'   0.0061   0.0033
 'International Tables Vol C Tables 4.2.6.8 and 6.1.1.4'
 'O'  'O'   0.0106   0.0060
 'International Tables Vol C Tables 4.2.6.8 and 6.1.1.4'
 'W'  'W'  -0.8490   6.8722
 'International Tables Vol C Tables 4.2.6.8 and 6.1.1.4'
 
_symmetry_cell_setting            Triclinic
_symmetry_space_group_name_H-M   'P-1'
 
loop_
 _symmetry_equiv_pos_as_xyz
 'x, y, z'
 '-x, -y, -z'
 
_cell_length_a                    9.7773(15)
_cell_length_b                    11.3376(17)
_cell_length_c                    11.7186(18)
_cell_angle_alpha                 77.630(6)
_cell_angle_beta                  65.729(5)
_cell_angle_gamma                 88.019(6)
_cell_volume                      1154.6(3)
_cell_formula_units_Z             2
_cell_measurement_temperature     173(2)
_cell_measurement_reflns_used     ?
_cell_measurement_theta_min       1.8
_cell_measurement_theta_max       28.1
 
_exptl_crystal_description       prism
_exptl_crystal_colour              'red-orange'
_exptl_crystal_size_max          0.1
_exptl_crystal_size_mid           0.07
_exptl_crystal_size_min           0.05
_exptl_crystal_density_meas       ?
_exptl_crystal_density_diffrn     1.632
_exptl_crystal_density_method     'not measured'
_exptl_crystal_F_000              572
_exptl_absorpt_coefficient_mu     5.019
_exptl_absorpt_correction_type    'Multi-scan'
_exptl_absorpt_correction_T_min    0.577
_exptl_absorpt_correction_T_max   0.778
_exptl_absorpt_process_details    ?
 
_exptl_special_details
;
 ?
;
 
_diffrn_ambient_temperature       173(2)
_diffrn_radiation_wavelength      0.71073
_diffrn_radiation_type            MoK\a
_diffrn_radiation_source          'fine-focus sealed tube'
_diffrn_radiation_monochromator   graphite
_diffrn_measurement_device_type   ?
_diffrn_measurement_method        ?
_diffrn_detector_area_resol_mean  ?
_diffrn_standards_number          ?
_diffrn_standards_interval_count  ?
_diffrn_standards_interval_time   ?
_diffrn_standards_decay_%         ?
_diffrn_reflns_number             17232
_diffrn_reflns_av_R_equivalents   0.0712
_diffrn_reflns_av_sigmaI/netI     0.1173
_diffrn_reflns_limit_h_min        -12
_diffrn_reflns_limit_h_max        12
_diffrn_reflns_limit_k_min        -15
_diffrn_reflns_limit_k_max        14
_diffrn_reflns_limit_l_min        -15
_diffrn_reflns_limit_l_max        15
_diffrn_reflns_theta_min          1.84
_diffrn_reflns_theta_max          28.10
_reflns_number_total              5172
_reflns_number_gt                 3590
_reflns_threshold_expression      >2sigma(I)
 
_computing_data_collection        ?
_computing_cell_refinement        ?
_computing_data_reduction         ?
_computing_structure_solution     ?
_computing_structure_refinement   'SHELXL-97 (Sheldrick, 1997)'
_computing_molecular_graphics     ?
_computing_publication_material   ?
 
_refine_special_details
;
 Refinement of F^2^ against ALL reflections.  The weighted R-factor wR and
 goodness of fit S are based on F^2^, conventional R-factors R are based
 on F, with F set to zero for negative F^2^. The threshold expression of
 F^2^ > 2sigma(F^2^) is used only for calculating R-factors(gt) etc. and is
 not relevant to the choice of reflections for refinement.  R-factors based
 on F^2^ are statistically about twice as large as those based on F, and R-
 factors based on ALL data will be even larger.
;
 
_refine_ls_structure_factor_coef  Fsqd
_refine_ls_matrix_type            full
_refine_ls_weighting_scheme       calc
_refine_ls_weighting_details
 'calc w=1/[\s^2^(Fo^2^)+(0.1028P)^2^+0.0000P] where P=(Fo^2^+2Fc^2^)/3'
_atom_sites_solution_primary      direct
_atom_sites_solution_secondary    difmap
_atom_sites_solution_hydrogens    geom
_refine_ls_hydrogen_treatment     mixed
_refine_ls_extinction_method      none
_refine_ls_extinction_coef        ?
_refine_ls_number_reflns          5172
_refine_ls_number_parameters      277
_refine_ls_number_restraints      0
_refine_ls_R_factor_all           0.1159
_refine_ls_R_factor_gt            0.0677
_refine_ls_wR_factor_ref          0.1773
_refine_ls_wR_factor_gt           0.1514
_refine_ls_goodness_of_fit_ref    1.044
_refine_ls_restrained_S_all       1.044
_refine_ls_shift/su_max           0.003
_refine_ls_shift/su_mean          0.000
 
loop_
 _atom_site_label
 _atom_site_type_symbol
 _atom_site_fract_x
 _atom_site_fract_y
 _atom_site_fract_z
 _atom_site_U_iso_or_equiv
 _atom_site_adp_type
 _atom_site_occupancy
 _atom_site_symmetry_multiplicity
 _atom_site_calc_flag
 _atom_site_refinement_flags
 _atom_site_disorder_assembly
 _atom_site_disorder_group
C1 C 0.0846(14) 0.5517(9) 0.2406(13) 0.029(3) Uani 1 1 d . . .
C2 C 0.1522(15) 0.4750(12) 0.1424(14) 0.043(3) Uani 1 1 d . . .
H2A H 0.2624 0.4927 0.0991 0.051 Uiso 1 1 calc R . .
H2B H 0.1113 0.4965 0.0766 0.051 Uiso 1 1 calc R . .
C3 C 0.1182(15) 0.3362(12) 0.2048(15) 0.046(4) Uani 1 1 d . . .
H3A H 0.1524 0.2915 0.1350 0.056 Uiso 1 1 calc R . .
H3B H 0.1792 0.3124 0.2548 0.056 Uiso 1 1 calc R . .
C4 C -0.0431(16) 0.2962(12) 0.2914(15) 0.046(4) Uani 1 1 d . . .
H4A H -0.0734 0.3333 0.3667 0.055 Uiso 1 1 calc R . .
H4B H -0.0491 0.2074 0.3231 0.055 Uiso 1 1 calc R . .
C5 C -0.1572(15) 0.3260(11) 0.2332(14) 0.041(3) Uani 1 1 d . . .
H5A H -0.2305 0.2559 0.2641 0.049 Uiso 1 1 calc R . .
H5B H -0.1041 0.3381 0.1388 0.049 Uiso 1 1 calc R . .
C6 C -0.2449(14) 0.4414(12) 0.2661(14) 0.042(3) Uani 1 1 d . . .
H6A H -0.3279 0.4450 0.2380 0.051 Uiso 1 1 calc R . .
H6B H -0.2909 0.4312 0.3605 0.051 Uiso 1 1 calc R . .
C7 C -0.1537(13) 0.5626(11) 0.2073(13) 0.035(3) Uani 1 1 d . . .
H7A H -0.0850 0.5642 0.1170 0.041 Uiso 1 1 calc R . .
H7B H -0.2231 0.6283 0.2074 0.041 Uiso 1 1 calc R . .
C8 C -0.0627(14) 0.5860(12) 0.2786(14) 0.040(3) Uani 1 1 d . . .
C9 C -0.1443(14) 0.6307(11) 0.4026(14) 0.037(3) Uani 1 1 d . C .
H9 H -0.1441 0.5628 0.4728 0.045 Uiso 1 1 calc R . .
C10 C -0.0328(14) 0.7263(12) 0.3899(12) 0.035(3) Uani 1 1 d . . .
C11 C -0.0244(14) 0.8510(11) 0.3284(12) 0.032(3) Uani 1 1 d . . .
C12 C -0.1500(14) 0.9189(12) 0.3083(14) 0.040(3) Uani 1 1 d . . .
H12A H -0.1976 0.8707 0.2716 0.048 Uiso 1 1 calc R . .
H12B H -0.1078 0.9960 0.2451 0.048 Uiso 1 1 calc R . .
C13 C -0.2730(16) 0.9467(14) 0.4344(15) 0.054(4) Uani 1 1 d . . .
H13A H -0.2368 1.0191 0.4507 0.065 Uiso 1 1 calc R A 1
H13B H -0.3642 0.9679 0.4194 0.065 Uiso 1 1 calc R A 1
C16 C -0.3078(15) 0.6636(14) 0.4438(15) 0.047(4) Uani 1 1 d . . .
H16A H -0.3695 0.5888 0.4623 0.056 Uiso 1 1 calc R B 1
H16B H -0.3161 0.7191 0.3694 0.056 Uiso 1 1 calc R B 1
C17 C 0.3334(12) 0.8208(11) 0.2197(12) 0.030(3) Uani 1 1 d . . .
C18 C 0.2982(13) 0.9175(11) 0.1351(13) 0.033(3) Uani 1 1 d . . .
C19 C 0.3268(13) 0.8755(13) 0.0227(12) 0.036(3) Uani 1 1 d . . .
C20 C 0.3788(12) 0.7592(11) 0.0310(11) 0.025(2) Uani 1 1 d . . .
C21 C 0.3847(12) 0.7233(10) 0.1547(12) 0.028(3) Uani 1 1 d . . .
C22 C 0.3246(15) 0.8228(13) 0.3497(12) 0.041(3) Uani 1 1 d . . .
H22A H 0.2224 0.8397 0.4047 0.061 Uiso 1 1 calc R . .
H22B H 0.3958 0.8860 0.3419 0.061 Uiso 1 1 calc R . .
H22C H 0.3498 0.7441 0.3877 0.061 Uiso 1 1 calc R . .
C23 C 0.2595(15) 1.0434(10) 0.1551(14) 0.042(3) Uani 1 1 d . . .
H23A H 0.3290 1.1026 0.0813 0.062 Uiso 1 1 calc R . .
H23B H 0.2682 1.0530 0.2331 0.062 Uiso 1 1 calc R . .
H23C H 0.1563 1.0565 0.1641 0.062 Uiso 1 1 calc R . .
C24 C 0.3176(15) 0.9561(12) -0.0984(13) 0.042(3) Uani 1 1 d . . .
H24A H 0.4133 1.0032 -0.1514 0.064 Uiso 1 1 calc R . .
H24B H 0.2365 1.0111 -0.0726 0.064 Uiso 1 1 calc R . .
H24C H 0.2973 0.9048 -0.1479 0.064 Uiso 1 1 calc R . .
C25 C 0.4428(14) 0.6932(13) -0.0764(13) 0.041(3) Uani 1 1 d . . .
H25A H 0.3748 0.6966 -0.1193 0.061 Uiso 1 1 calc R . .
H25B H 0.4541 0.6086 -0.0417 0.061 Uiso 1 1 calc R . .
H25C H 0.5412 0.7315 -0.1383 0.061 Uiso 1 1 calc R . .
C26 C 0.4443(15) 0.6084(12) 0.2025(14) 0.044(3) Uani 1 1 d . . .
H26A H 0.5544 0.6145 0.1606 0.066 Uiso 1 1 calc R . .
H26B H 0.4061 0.5402 0.1827 0.066 Uiso 1 1 calc R . .
H26C H 0.4114 0.5955 0.2956 0.066 Uiso 1 1 calc R . .
N1 N 0.0178(11) 0.7869(9) 0.0882(10) 0.030(2) Uani 1 1 d . . .
O1 O -0.0506(10) 0.8164(9) 0.0190(9) 0.046(2) Uani 1 1 d . . .
W1 W 0.12618(5) 0.75706(4) 0.17972(5) 0.02375(17) Uani 1 1 d . . .
C15A C -0.379(3) 0.723(2) 0.559(2) 0.046(6) Uiso 0.70 1 d P C 1
H15A H -0.3689 0.6676 0.6334 0.056 Uiso 0.70 1 calc PR C 1
H15B H -0.4873 0.7267 0.5804 0.056 Uiso 0.70 1 calc PR C 1
C14A C -0.316(2) 0.8523(17) 0.5487(19) 0.042(5) Uiso 0.70 1 d P C 1
H14A H -0.3927 0.8849 0.6189 0.050 Uiso 0.70 1 calc PR C 1
H14B H -0.2266 0.8407 0.5686 0.050 Uiso 0.70 1 calc PR C 1
C14B C -0.394(6) 0.845(4) 0.532(5) 0.046(12) Uiso 0.30 1 d P C 2
H14C H -0.4718 0.8384 0.4992 0.055 Uiso 0.30 1 calc PR C 2
H14D H -0.4439 0.8703 0.6144 0.055 Uiso 0.30 1 calc PR C 2
C15B C -0.329(8) 0.707(6) 0.560(6) 0.058(18) Uiso 0.30 1 d P C 2
H15C H -0.2335 0.7125 0.5683 0.069 Uiso 0.30 1 calc PR C 2
H15D H -0.4036 0.6537 0.6379 0.069 Uiso 0.30 1 calc PR C 2
H10 H 0.017(14) 0.721(11) 0.440(12) 0.03(3) Uiso 1 1 d . . .
H1 H 0.116(16) 0.529(13) 0.304(14) 0.05(4) Uiso 1 1 d . . .
H11 H 0.041(15) 0.888(13) 0.358(13) 0.05(4) Uiso 1 1 d . . .
 
loop_
 _atom_site_aniso_label
 _atom_site_aniso_U_11
 _atom_site_aniso_U_22
 _atom_site_aniso_U_33
 _atom_site_aniso_U_23
 _atom_site_aniso_U_13
 _atom_site_aniso_U_12
C1 0.039(7) 0.008(5) 0.046(8) 0.003(5) -0.027(6) -0.001(5)
C2 0.037(7) 0.038(7) 0.056(9) -0.012(7) -0.022(7) 0.008(6)
C3 0.044(8) 0.033(7) 0.071(10) -0.015(7) -0.030(8) 0.008(6)
C4 0.050(8) 0.025(6) 0.062(9) -0.001(7) -0.026(8) -0.002(6)
C5 0.049(8) 0.025(6) 0.055(9) -0.013(6) -0.025(7) -0.002(6)
C6 0.035(7) 0.037(7) 0.062(9) -0.015(7) -0.026(7) 0.005(6)
C7 0.026(6) 0.040(7) 0.046(8) -0.018(6) -0.021(6) 0.014(6)
C8 0.036(7) 0.033(7) 0.061(9) -0.012(7) -0.030(7) 0.006(6)
C9 0.037(7) 0.027(6) 0.054(8) -0.024(6) -0.017(6) -0.001(6)
C10 0.040(7) 0.040(7) 0.037(7) -0.011(6) -0.028(6) -0.003(6)
C11 0.035(7) 0.031(6) 0.038(7) -0.013(6) -0.021(6) 0.006(6)
C12 0.034(7) 0.028(6) 0.058(9) -0.019(7) -0.016(7) 0.015(6)
C13 0.042(8) 0.052(9) 0.062(10) -0.027(8) -0.009(8) 0.010(7)
C16 0.036(7) 0.046(8) 0.064(10) -0.016(8) -0.024(7) 0.007(7)
C17 0.023(6) 0.030(6) 0.044(7) -0.003(6) -0.024(6) -0.004(5)
C18 0.027(6) 0.026(6) 0.049(8) -0.004(6) -0.020(6) -0.003(5)
C19 0.025(6) 0.060(9) 0.029(7) -0.015(6) -0.013(5) -0.008(6)
C20 0.017(5) 0.029(6) 0.027(6) -0.014(5) -0.004(5) 0.003(5)
C21 0.025(6) 0.024(6) 0.040(7) -0.007(5) -0.018(5) 0.004(5)
C22 0.038(7) 0.054(8) 0.035(7) -0.012(7) -0.018(6) -0.007(7)
C23 0.042(7) 0.021(6) 0.062(9) -0.014(6) -0.019(7) 0.006(6)
C24 0.046(8) 0.036(7) 0.037(7) -0.002(6) -0.012(6) 0.009(6)
C25 0.034(7) 0.043(8) 0.046(8) -0.022(7) -0.011(6) 0.004(6)
C26 0.039(7) 0.033(7) 0.063(9) -0.004(7) -0.027(7) 0.006(6)
N1 0.028(5) 0.034(5) 0.035(6) -0.010(5) -0.019(5) 0.009(4)
O1 0.049(5) 0.049(6) 0.056(6) -0.010(5) -0.039(5) 0.011(5)
W1 0.0246(3) 0.0233(2) 0.0310(3) -0.01036(19) -0.0172(2) 0.00598(17)
 
_geom_special_details
;
 All esds (except the esd in the dihedral angle between two l.s. planes)
 are estimated using the full covariance matrix.  The cell esds are taken
 into account individually in the estimation of esds in distances, angles
 and torsion angles; correlations between esds in cell parameters are only
 used when they are defined by crystal symmetry.  An approximate (isotropic)
 treatment of cell esds is used for estimating esds involving l.s. planes.
;
 
loop_
 _geom_bond_atom_site_label_1
 _geom_bond_atom_site_label_2
 _geom_bond_distance
 _geom_bond_site_symmetry_2
 _geom_bond_publ_flag
C1 C8 1.390(17) . ?
C1 C2 1.510(19) . ?
C1 W1 2.283(10) . ?
C2 C3 1.570(19) . ?
C3 C4 1.503(19) . ?
C4 C5 1.524(18) . ?
C5 C6 1.570(18) . ?
C6 C7 1.527(17) . ?
C7 C8 1.511(17) . ?
C8 C9 1.529(19) . ?
C8 W1 2.458(13) . ?
C9 C10 1.505(16) . ?
C9 C16 1.526(18) . ?
C10 C11 1.431(17) . ?
C10 W1 2.264(13) . ?
C11 C12 1.501(17) . ?
C11 W1 2.217(13) . ?
C12 C13 1.562(19) . ?
C13 C14A 1.44(2) . ?
C13 C14B 1.57(5) . ?
C16 C15B 1.47(7) . ?
C16 C15A 1.53(3) . ?
C17 C21 1.435(17) . ?
C17 C18 1.446(16) . ?
C17 C22 1.496(17) . ?
C17 W1 2.423(10) . ?
C18 C19 1.414(18) . ?
C18 C23 1.507(17) . ?
C18 W1 2.343(11) . ?
C19 C20 1.395(18) . ?
C19 C24 1.549(17) . ?
C19 W1 2.279(12) . ?
C20 C21 1.444(16) . ?
C20 C25 1.502(17) . ?
C20 W1 2.364(11) . ?
C21 C26 1.502(16) . ?
C21 W1 2.448(11) . ?
N1 O1 1.238(12) . ?
N1 W1 1.772(9) . ?
C15A C14A 1.57(3) . ?
C14B C15B 1.68(8) . ?
 
loop_
 _geom_angle_atom_site_label_1
 _geom_angle_atom_site_label_2
 _geom_angle_atom_site_label_3
 _geom_angle
 _geom_angle_site_symmetry_1
 _geom_angle_site_symmetry_3
 _geom_angle_publ_flag
C8 C1 C2 122.5(12) . . ?
C8 C1 W1 80.0(7) . . ?
C2 C1 W1 119.9(8) . . ?
C1 C2 C3 112.0(12) . . ?
C4 C3 C2 116.3(12) . . ?
C3 C4 C5 116.7(12) . . ?
C4 C5 C6 114.1(11) . . ?
C7 C6 C5 116.6(11) . . ?
C8 C7 C6 112.8(11) . . ?
C1 C8 C7 119.9(13) . . ?
C1 C8 C9 121.8(12) . . ?
C7 C8 C9 117.8(11) . . ?
C1 C8 W1 66.2(6) . . ?
C7 C8 W1 118.3(9) . . ?
C9 C8 W1 93.6(7) . . ?
C10 C9 C16 117.0(11) . . ?
C10 C9 C8 101.9(10) . . ?
C16 C9 C8 120.5(11) . . ?
C11 C10 C9 125.3(11) . . ?
C11 C10 W1 69.6(7) . . ?
C9 C10 W1 102.3(8) . . ?
C10 C11 C12 126.1(11) . . ?
C10 C11 W1 73.2(8) . . ?
C12 C11 W1 119.3(9) . . ?
C11 C12 C13 113.2(12) . . ?
C14A C13 C12 117.0(14) . . ?
C14A C13 C14B 33.6(18) . . ?
C12 C13 C14B 120(2) . . ?
C15B C16 C9 100(3) . . ?
C15B C16 C15A 19(3) . . ?
C9 C16 C15A 118.4(15) . . ?
C21 C17 C18 107.9(11) . . ?
C21 C17 C22 125.5(11) . . ?
C18 C17 C22 126.5(12) . . ?
C21 C17 W1 73.8(6) . . ?
C18 C17 W1 69.3(6) . . ?
C22 C17 W1 124.4(8) . . ?
C19 C18 C17 106.1(11) . . ?
C19 C18 C23 126.6(12) . . ?
C17 C18 C23 126.8(12) . . ?
C19 C18 W1 69.7(7) . . ?
C17 C18 W1 75.4(6) . . ?
C23 C18 W1 126.0(8) . . ?
C20 C19 C18 111.4(11) . . ?
C20 C19 C24 125.3(11) . . ?
C18 C19 C24 123.0(12) . . ?
C20 C19 W1 75.9(7) . . ?
C18 C19 W1 74.7(7) . . ?
C24 C19 W1 122.1(8) . . ?
C19 C20 C21 106.8(10) . . ?
C19 C20 C25 126.3(11) . . ?
C21 C20 C25 126.0(11) . . ?
C19 C20 W1 69.2(7) . . ?
C21 C20 W1 75.7(6) . . ?
C25 C20 W1 128.4(8) . . ?
C17 C21 C20 107.7(10) . . ?
C17 C21 C26 126.2(11) . . ?
C20 C21 C26 125.9(12) . . ?
C17 C21 W1 71.9(6) . . ?
C20 C21 W1 69.4(6) . . ?
C26 C21 W1 127.4(8) . . ?
O1 N1 W1 174.8(9) . . ?
N1 W1 C11 93.4(4) . . ?
N1 W1 C10 108.1(4) . . ?
C11 W1 C10 37.2(5) . . ?
N1 W1 C19 92.6(4) . . ?
C11 W1 C19 114.1(5) . . ?
C10 W1 C19 143.3(4) . . ?
N1 W1 C1 98.3(4) . . ?
C11 W1 C1 112.8(5) . . ?
C10 W1 C1 76.8(5) . . ?
C19 W1 C1 130.9(5) . . ?
N1 W1 C18 113.0(4) . . ?
C11 W1 C18 83.4(5) . . ?
C10 W1 C18 107.7(5) . . ?
C19 W1 C18 35.6(4) . . ?
C1 W1 C18 144.1(4) . . ?
N1 W1 C20 106.3(4) . . ?
C11 W1 C20 141.9(4) . . ?
C10 W1 C20 145.6(4) . . ?
C19 W1 C20 34.9(5) . . ?
C1 W1 C20 96.5(4) . . ?
C18 W1 C20 59.1(4) . . ?
N1 W1 C17 147.9(4) . . ?
C11 W1 C17 88.0(4) . . ?
C10 W1 C17 92.2(4) . . ?
C19 W1 C17 58.1(4) . . ?
C1 W1 C17 110.7(4) . . ?
C18 W1 C17 35.3(4) . . ?
C20 W1 C17 58.1(4) . . ?
N1 W1 C21 141.0(4) . . ?
C11 W1 C21 120.4(4) . . ?
C10 W1 C21 110.7(4) . . ?
C19 W1 C21 57.6(4) . . ?
C1 W1 C21 86.6(4) . . ?
C18 W1 C21 58.1(4) . . ?
C20 W1 C21 34.9(4) . . ?
C17 W1 C21 34.3(4) . . ?
N1 W1 C8 77.4(4) . . ?
C11 W1 C8 87.7(5) . . ?
C10 W1 C8 59.7(5) . . ?
C19 W1 C8 156.8(5) . . ?
C1 W1 C8 33.8(4) . . ?
C18 W1 C8 166.6(4) . . ?
C20 W1 C8 127.8(4) . . ?
C17 W1 C8 134.7(4) . . ?
C21 W1 C8 119.4(4) . . ?
C16 C15A C14A 118.6(18) . . ?
C13 C14A C15A 123.0(18) . . ?
C13 C14B C15B 116(4) . . ?
C16 C15B C14B 102(4) . . ?
 
loop_
 _geom_torsion_atom_site_label_1
 _geom_torsion_atom_site_label_2
 _geom_torsion_atom_site_label_3
 _geom_torsion_atom_site_label_4
 _geom_torsion
 _geom_torsion_site_symmetry_1
 _geom_torsion_site_symmetry_2
 _geom_torsion_site_symmetry_3
 _geom_torsion_site_symmetry_4
 _geom_torsion_publ_flag
C8 C1 C2 C3 -85.9(15) . . . . ?
W1 C1 C2 C3 176.7(8) . . . . ?
C1 C2 C3 C4 50.1(17) . . . . ?
C2 C3 C4 C5 57.2(18) . . . . ?
C3 C4 C5 C6 -98.9(15) . . . . ?
C4 C5 C6 C7 68.0(16) . . . . ?
C5 C6 C7 C8 -79.1(15) . . . . ?
C2 C1 C8 C7 -9.1(18) . . . . ?
W1 C1 C8 C7 110.1(11) . . . . ?
C2 C1 C8 C9 162.0(11) . . . . ?
W1 C1 C8 C9 -78.8(11) . . . . ?
C2 C1 C8 W1 -119.2(12) . . . . ?
C6 C7 C8 C1 92.0(15) . . . . ?
C6 C7 C8 C9 -79.5(14) . . . . ?
C6 C7 C8 W1 169.2(9) . . . . ?
C1 C8 C9 C10 50.7(15) . . . . ?
C7 C8 C9 C10 -138.1(12) . . . . ?
W1 C8 C9 C10 -13.4(10) . . . . ?
C1 C8 C9 C16 -177.9(12) . . . . ?
C7 C8 C9 C16 -6.7(18) . . . . ?
W1 C8 C9 C16 118.0(11) . . . . ?
C16 C9 C10 C11 -45.1(19) . . . . ?
C8 C9 C10 C11 88.5(15) . . . . ?
C16 C9 C10 W1 -118.7(11) . . . . ?
C8 C9 C10 W1 14.9(11) . . . . ?
C9 C10 C11 C12 23(2) . . . . ?
W1 C10 C11 C12 114.3(13) . . . . ?
C9 C10 C11 W1 -90.9(13) . . . . ?
C10 C11 C12 C13 72.9(17) . . . . ?
W1 C11 C12 C13 162.8(9) . . . . ?
C11 C12 C13 C14A -40.9(19) . . . . ?
C11 C12 C13 C14B -79(3) . . . . ?
C10 C9 C16 C15B -52(3) . . . . ?
C8 C9 C16 C15B -177(3) . . . . ?
C10 C9 C16 C15A -48(2) . . . . ?
C8 C9 C16 C15A -172.6(14) . . . . ?
C21 C17 C18 C19 0.8(12) . . . . ?
C22 C17 C18 C19 178.5(11) . . . . ?
W1 C17 C18 C19 -63.4(7) . . . . ?
C21 C17 C18 C23 -171.5(11) . . . . ?
C22 C17 C18 C23 6.1(19) . . . . ?
W1 C17 C18 C23 124.3(12) . . . . ?
C21 C17 C18 W1 64.2(8) . . . . ?
C22 C17 C18 W1 -118.1(11) . . . . ?
C17 C18 C19 C20 -0.5(13) . . . . ?
C23 C18 C19 C20 171.9(11) . . . . ?
W1 C18 C19 C20 -67.7(8) . . . . ?
C17 C18 C19 C24 -174.1(11) . . . . ?
C23 C18 C19 C24 -1.8(18) . . . . ?
W1 C18 C19 C24 118.6(11) . . . . ?
C17 C18 C19 W1 67.3(8) . . . . ?
C23 C18 C19 W1 -120.4(12) . . . . ?
C18 C19 C20 C21 -0.1(13) . . . . ?
C24 C19 C20 C21 173.4(11) . . . . ?
W1 C19 C20 C21 -67.1(7) . . . . ?
C18 C19 C20 C25 -170.0(11) . . . . ?
C24 C19 C20 C25 3.5(19) . . . . ?
W1 C19 C20 C25 123.1(11) . . . . ?
C18 C19 C20 W1 67.0(8) . . . . ?
C24 C19 C20 W1 -119.5(12) . . . . ?
C18 C17 C21 C20 -0.9(12) . . . . ?
C22 C17 C21 C20 -178.6(10) . . . . ?
W1 C17 C21 C20 60.4(7) . . . . ?
C18 C17 C21 C26 175.1(11) . . . . ?
C22 C17 C21 C26 -2.6(18) . . . . ?
W1 C17 C21 C26 -123.6(12) . . . . ?
C18 C17 C21 W1 -61.3(7) . . . . ?
C22 C17 C21 W1 121.0(11) . . . . ?
C19 C20 C21 C17 0.6(12) . . . . ?
C25 C20 C21 C17 170.5(11) . . . . ?
W1 C20 C21 C17 -62.1(8) . . . . ?
C19 C20 C21 C26 -175.4(11) . . . . ?
C25 C20 C21 C26 -5.4(18) . . . . ?
W1 C20 C21 C26 122.0(11) . . . . ?
C19 C20 C21 W1 62.7(8) . . . . ?
C25 C20 C21 W1 -127.4(11) . . . . ?
O1 N1 W1 C11 90(10) . . . . ?
O1 N1 W1 C10 125(10) . . . . ?
O1 N1 W1 C19 -24(10) . . . . ?
O1 N1 W1 C1 -156(10) . . . . ?
O1 N1 W1 C18 6(10) . . . . ?
O1 N1 W1 C20 -57(10) . . . . ?
O1 N1 W1 C17 -2(10) . . . . ?
O1 N1 W1 C21 -61(10) . . . . ?
O1 N1 W1 C8 177(10) . . . . ?
C10 C11 W1 N1 115.9(7) . . . . ?
C12 C11 W1 N1 -6.5(10) . . . . ?
C12 C11 W1 C10 -122.4(13) . . . . ?
C10 C11 W1 C19 -149.8(7) . . . . ?
C12 C11 W1 C19 87.8(10) . . . . ?
C10 C11 W1 C1 15.3(8) . . . . ?
C12 C11 W1 C1 -107.1(10) . . . . ?
C10 C11 W1 C18 -131.4(7) . . . . ?
C12 C11 W1 C18 106.3(10) . . . . ?
C10 C11 W1 C20 -122.1(8) . . . . ?
C12 C11 W1 C20 115.5(10) . . . . ?
C10 C11 W1 C17 -96.3(7) . . . . ?
C12 C11 W1 C17 141.3(10) . . . . ?
C10 C11 W1 C21 -84.6(8) . . . . ?
C12 C11 W1 C21 153.1(9) . . . . ?
C10 C11 W1 C8 38.6(7) . . . . ?
C12 C11 W1 C8 -83.8(10) . . . . ?
C11 C10 W1 N1 -70.9(8) . . . . ?
C9 C10 W1 N1 52.5(9) . . . . ?
C9 C10 W1 C11 123.4(12) . . . . ?
C11 C10 W1 C19 50.3(11) . . . . ?
C9 C10 W1 C19 173.7(8) . . . . ?
C11 C10 W1 C1 -165.5(8) . . . . ?
C9 C10 W1 C1 -42.1(8) . . . . ?
C11 C10 W1 C18 51.5(8) . . . . ?
C9 C10 W1 C18 174.9(8) . . . . ?
C11 C10 W1 C20 112.3(9) . . . . ?
C9 C10 W1 C20 -124.3(9) . . . . ?
C11 C10 W1 C17 83.8(7) . . . . ?
C9 C10 W1 C17 -152.8(8) . . . . ?
C11 C10 W1 C21 113.4(7) . . . . ?
C9 C10 W1 C21 -123.2(8) . . . . ?
C11 C10 W1 C8 -133.8(8) . . . . ?
C9 C10 W1 C8 -10.4(8) . . . . ?
C20 C19 W1 N1 -115.1(7) . . . . ?
C18 C19 W1 N1 127.5(8) . . . . ?
C24 C19 W1 N1 7.9(11) . . . . ?
C20 C19 W1 C11 149.9(7) . . . . ?
C18 C19 W1 C11 32.6(9) . . . . ?
C24 C19 W1 C11 -87.0(11) . . . . ?
C20 C19 W1 C10 119.3(9) . . . . ?
C18 C19 W1 C10 2.0(12) . . . . ?
C24 C19 W1 C10 -117.7(10) . . . . ?
C20 C19 W1 C1 -11.8(9) . . . . ?
C18 C19 W1 C1 -129.1(8) . . . . ?
C24 C19 W1 C1 111.3(11) . . . . ?
C20 C19 W1 C18 117.3(10) . . . . ?
C24 C19 W1 C18 -119.6(14) . . . . ?
C18 C19 W1 C20 -117.3(10) . . . . ?
C24 C19 W1 C20 123.0(13) . . . . ?
C20 C19 W1 C17 78.8(7) . . . . ?
C18 C19 W1 C17 -38.5(7) . . . . ?
C24 C19 W1 C17 -158.2(12) . . . . ?
C20 C19 W1 C21 38.1(7) . . . . ?
C18 C19 W1 C21 -79.3(7) . . . . ?
C24 C19 W1 C21 161.1(12) . . . . ?
C20 C19 W1 C8 -51.7(13) . . . . ?
C18 C19 W1 C8 -169.0(9) . . . . ?
C24 C19 W1 C8 71.4(17) . . . . ?
C8 C1 W1 N1 -52.2(9) . . . . ?
C2 C1 W1 N1 69.6(10) . . . . ?
C8 C1 W1 C11 45.1(9) . . . . ?
C2 C1 W1 C11 166.9(9) . . . . ?
C8 C1 W1 C10 54.6(8) . . . . ?
C2 C1 W1 C10 176.4(10) . . . . ?
C8 C1 W1 C19 -153.0(8) . . . . ?
C2 C1 W1 C19 -31.2(11) . . . . ?
C8 C1 W1 C18 156.7(8) . . . . ?
C2 C1 W1 C18 -81.5(12) . . . . ?
C8 C1 W1 C20 -159.7(8) . . . . ?
C2 C1 W1 C20 -37.9(10) . . . . ?
C8 C1 W1 C17 141.9(8) . . . . ?
C2 C1 W1 C17 -96.3(10) . . . . ?
C8 C1 W1 C21 166.8(9) . . . . ?
C2 C1 W1 C21 -71.4(9) . . . . ?
C2 C1 W1 C8 121.8(13) . . . . ?
C19 C18 W1 N1 -59.4(9) . . . . ?
C17 C18 W1 N1 -173.1(7) . . . . ?
C23 C18 W1 N1 61.8(12) . . . . ?
C19 C18 W1 C11 -150.3(8) . . . . ?
C17 C18 W1 C11 96.0(8) . . . . ?
C23 C18 W1 C11 -29.1(11) . . . . ?
C19 C18 W1 C10 -178.8(8) . . . . ?
C17 C18 W1 C10 67.5(8) . . . . ?
C23 C18 W1 C10 -57.6(12) . . . . ?
C17 C18 W1 C19 -113.7(11) . . . . ?
C23 C18 W1 C19 121.2(14) . . . . ?
C19 C18 W1 C1 89.4(10) . . . . ?
C17 C18 W1 C1 -24.3(12) . . . . ?
C23 C18 W1 C1 -149.4(10) . . . . ?
C19 C18 W1 C20 36.4(7) . . . . ?
C17 C18 W1 C20 -77.4(8) . . . . ?
C23 C18 W1 C20 157.5(13) . . . . ?
C19 C18 W1 C17 113.7(11) . . . . ?
C23 C18 W1 C17 -125.1(15) . . . . ?
C19 C18 W1 C21 77.5(8) . . . . ?
C17 C18 W1 C21 -36.3(7) . . . . ?
C23 C18 W1 C21 -161.4(13) . . . . ?
C19 C18 W1 C8 161.1(16) . . . . ?
C17 C18 W1 C8 47(2) . . . . ?
C23 C18 W1 C8 -78(2) . . . . ?
C19 C20 W1 N1 70.4(7) . . . . ?
C21 C20 W1 N1 -175.0(7) . . . . ?
C25 C20 W1 N1 -50.1(12) . . . . ?
C19 C20 W1 C11 -47.8(10) . . . . ?
C21 C20 W1 C11 66.8(9) . . . . ?
C25 C20 W1 C11 -168.3(10) . . . . ?
C19 C20 W1 C10 -112.8(9) . . . . ?
C21 C20 W1 C10 1.7(11) . . . . ?
C25 C20 W1 C10 126.7(11) . . . . ?
C21 C20 W1 C19 114.6(9) . . . . ?
C25 C20 W1 C19 -120.5(14) . . . . ?
C19 C20 W1 C1 171.1(7) . . . . ?
C21 C20 W1 C1 -74.4(7) . . . . ?
C25 C20 W1 C1 50.5(11) . . . . ?
C19 C20 W1 C18 -37.1(7) . . . . ?
C21 C20 W1 C18 77.5(7) . . . . ?
C25 C20 W1 C18 -157.6(12) . . . . ?
C19 C20 W1 C17 -78.6(7) . . . . ?
C21 C20 W1 C17 35.9(6) . . . . ?
C25 C20 W1 C17 160.8(12) . . . . ?
C19 C20 W1 C21 -114.6(9) . . . . ?
C25 C20 W1 C21 124.9(14) . . . . ?
C19 C20 W1 C8 156.9(7) . . . . ?
C21 C20 W1 C8 -88.5(8) . . . . ?
C25 C20 W1 C8 36.4(13) . . . . ?
C21 C17 W1 N1 -104.9(10) . . . . ?
C18 C17 W1 N1 12.0(13) . . . . ?
C22 C17 W1 N1 132.8(11) . . . . ?
C21 C17 W1 C11 161.9(7) . . . . ?
C18 C17 W1 C11 -81.3(8) . . . . ?
C22 C17 W1 C11 39.5(11) . . . . ?
C21 C17 W1 C10 124.9(7) . . . . ?
C18 C17 W1 C10 -118.3(8) . . . . ?
C22 C17 W1 C10 2.5(11) . . . . ?
C21 C17 W1 C19 -78.0(8) . . . . ?
C18 C17 W1 C19 38.9(8) . . . . ?
C22 C17 W1 C19 159.7(13) . . . . ?
C21 C17 W1 C1 48.2(8) . . . . ?
C18 C17 W1 C1 165.0(8) . . . . ?
C22 C17 W1 C1 -74.2(11) . . . . ?
C21 C17 W1 C18 -116.9(10) . . . . ?
C22 C17 W1 C18 120.8(14) . . . . ?
C21 C17 W1 C20 -36.6(7) . . . . ?
C18 C17 W1 C20 80.3(8) . . . . ?
C22 C17 W1 C20 -158.9(12) . . . . ?
C18 C17 W1 C21 116.9(10) . . . . ?
C22 C17 W1 C21 -122.3(13) . . . . ?
C21 C17 W1 C8 77.1(9) . . . . ?
C18 C17 W1 C8 -166.1(7) . . . . ?
C22 C17 W1 C8 -45.3(13) . . . . ?
C17 C21 W1 N1 125.3(8) . . . . ?
C20 C21 W1 N1 7.6(10) . . . . ?
C26 C21 W1 N1 -112.5(12) . . . . ?
C17 C21 W1 C11 -21.2(8) . . . . ?
C20 C21 W1 C11 -138.9(7) . . . . ?
C26 C21 W1 C11 101.1(12) . . . . ?
C17 C21 W1 C10 -61.2(7) . . . . ?
C20 C21 W1 C10 -178.9(7) . . . . ?
C26 C21 W1 C10 61.0(12) . . . . ?
C17 C21 W1 C19 79.6(7) . . . . ?
C20 C21 W1 C19 -38.1(7) . . . . ?
C26 C21 W1 C19 -158.2(13) . . . . ?
C17 C21 W1 C1 -135.7(7) . . . . ?
C20 C21 W1 C1 106.6(7) . . . . ?
C26 C21 W1 C1 -13.5(12) . . . . ?
C17 C21 W1 C18 37.3(7) . . . . ?
C20 C21 W1 C18 -80.4(7) . . . . ?
C26 C21 W1 C18 159.5(13) . . . . ?
C17 C21 W1 C20 117.7(10) . . . . ?
C26 C21 W1 C20 -120.1(14) . . . . ?
C20 C21 W1 C17 -117.7(10) . . . . ?
C26 C21 W1 C17 122.2(14) . . . . ?
C17 C21 W1 C8 -127.3(7) . . . . ?
C20 C21 W1 C8 115.0(7) . . . . ?
C26 C21 W1 C8 -5.1(13) . . . . ?
C1 C8 W1 N1 126.8(9) . . . . ?
C7 C8 W1 N1 14.4(9) . . . . ?
C9 C8 W1 N1 -109.9(8) . . . . ?
C1 C8 W1 C11 -139.2(9) . . . . ?
C7 C8 W1 C11 108.4(10) . . . . ?
C9 C8 W1 C11 -15.9(8) . . . . ?
C1 C8 W1 C10 -113.3(9) . . . . ?
C7 C8 W1 C10 134.3(11) . . . . ?
C9 C8 W1 C10 10.0(7) . . . . ?
C1 C8 W1 C19 60.5(14) . . . . ?
C7 C8 W1 C19 -51.9(16) . . . . ?
C9 C8 W1 C19 -176.2(10) . . . . ?
C7 C8 W1 C1 -112.4(14) . . . . ?
C9 C8 W1 C1 123.3(12) . . . . ?
C1 C8 W1 C18 -91(2) . . . . ?
C7 C8 W1 C18 156.7(15) . . . . ?
C9 C8 W1 C18 32(2) . . . . ?
C1 C8 W1 C20 25.8(10) . . . . ?
C7 C8 W1 C20 -86.6(10) . . . . ?
C9 C8 W1 C20 149.2(7) . . . . ?
C1 C8 W1 C17 -54.3(11) . . . . ?
C7 C8 W1 C17 -166.6(8) . . . . ?
C9 C8 W1 C17 69.1(9) . . . . ?
C1 C8 W1 C21 -15.2(10) . . . . ?
C7 C8 W1 C21 -127.6(9) . . . . ?
C9 C8 W1 C21 108.1(8) . . . . ?
C15B C16 C15A C14A 78(9) . . . . ?
C9 C16 C15A C14A 66(3) . . . . ?
C12 C13 C14A C15A -58(3) . . . . ?
C14B C13 C14A C15A 46(4) . . . . ?
C16 C15A C14A C13 40(3) . . . . ?
C14A C13 C14B C15B -52(4) . . . . ?
C12 C13 C14B C15B 43(5) . . . . ?
C9 C16 C15B C14B 127(3) . . . . ?
C15A C16 C15B C14B -43(7) . . . . ?
C13 C14B C15B C16 -77(5) . . . . ?
 
_diffrn_measured_fraction_theta_max    0.919
_diffrn_reflns_theta_full              28.10
_diffrn_measured_fraction_theta_full   0.919
_refine_diff_density_max    4.694
_refine_diff_density_min   -4.014
_refine_diff_density_rms    0.293
